# CORRECTION

## Correction: Who Lives Where and Does It Matter? Changes in the Health Profiles of Older People Living in Long Term Care and the Community over Two Decades in a High Income Country

The *PLOS ONE* staff

There is an error in the byline for the 7<sup>th</sup> author. The correct author name should read: on behalf of the Cognitive Function Ageing Studies (CFAS) collaboration. The publisher apologizes for the error.

### Reference

1. Matthews FE, Bennett H, Wittenberg R, Jagger C, Denning T, Brayne C, et al. (2016) Who Lives Where and Does It Matter? Changes in the Health Profiles of Older People Living in Long Term Care and the Community over Two Decades in a High Income Country. PLoS ONE 11(9): e0161705. doi:[10.1371/journal.pone.0161705](https://doi.org/10.1371/journal.pone.0161705) PMID: [27589586](https://pubmed.ncbi.nlm.nih.gov/27589586/)

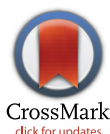

### OPEN ACCESS

**Citation:** The *PLOS ONE* staff (2016) Correction: Who Lives Where and Does It Matter? Changes in the Health Profiles of Older People Living in Long Term Care and the Community over Two Decades in a High Income Country. PLoS ONE 11(10): e0164935. doi:[10.1371/journal.pone.0164935](https://doi.org/10.1371/journal.pone.0164935)

**Published:** October 12, 2016

**Copyright:** © 2016 The PLOS ONE staff. This is an open access article distributed under the terms of the [Creative Commons Attribution License](https://creativecommons.org/licenses/by/4.0/), which permits unrestricted use, distribution, and reproduction in any medium, provided the original author and source are credited.
